# Supplementary material for: Nanotechnologies in Obstetrics and Cancer during Pregnancy: A Narrative Review
Source: MDPI journal article supplement (doi:10.3390/jpm12081324), 2022-08-17
Supplement: s1 [file s1]

**Supplementary Table S1.** Summary of database queries.

| Database | Query                                                                                                                                                                                                                                                                                                                                                                                                  | Date       | Number of Items |
|----------|--------------------------------------------------------------------------------------------------------------------------------------------------------------------------------------------------------------------------------------------------------------------------------------------------------------------------------------------------------------------------------------------------------|------------|-----------------|
| PubMed   | (pregnancy OR pregnancies OR gestation OR pregnant OR maternal-fetal OR mother-fetus OR "mother fetus" OR obstetric*) AND (nanotechnology OR nanomedicine OR nanoparticle* OR nanotherapeutic* OR nanoformulation* OR liposome* OR micelle* OR exosome* OR Nanotheranostic* OR nanofluidics OR "drug delivery" OR "precision medicine" OR nano-obstetric* OR nanoobstetric*)                           | 22.03.2022 | 6115            |
| Scopus   | TITLE-ABS-KEY(pregnancy OR pregnancies OR gestation OR pregnant OR maternal-fetal OR mother-fetus OR "mother fetus" OR obstetric*) AND TITLE-ABS-KEY(nanotechnology OR nanomedicine OR nanoparticle* OR nanotherapeutic* OR nanoformulation* OR liposome* OR micelle* OR exosome* OR Nanotheranostic* OR nanofluidics OR "drug delivery" OR "precision medicine" OR nano-obstetric* OR nanoobstetric*) | 22.03.2022 | 4031            |
| EMBASE   | AB,TI(pregnancy OR pregnancies OR gestation OR pregnant OR maternal-fetal OR mother-fetus OR "mother fetus" OR obstetric*) AND AB,TI(nanotechnology OR nanomedicine OR nanoparticle* OR nanotherapeutic* OR nanoformulation* OR liposome* OR micelle* OR exosome* OR Nanotheranostic* OR nanofluidics OR "drug delivery" OR "precision medicine" OR nano-obstetric* OR nanoobstetric*)                 | 22.03.2022 | 1836            |
